# Supplementary material for: Physiological, Agronomic, and Grain Quality Responses of Diverse Rice Genotypes to Various Irrigation Regimes under Aerobic Cultivation Conditions
Source: MDPI journal article supplement (doi:10.3390/life14030370), 2024-03-12
Supplement: s1 [file s1]

Table S1. Meteorological data for the two growing seasons of 2019 and 2020 at the experimental site.

| Month       | Temperature °C |         | Relative humidity% | Precipitation (mm) |
|-------------|----------------|---------|--------------------|--------------------|
|             | Maximum        | Minimum |                    |                    |
| Season 2019 |                |         |                    |                    |
| May         | 28.50          | 11.60   | 84.70              | 0.00               |
| June        | 31.70          | 17.00   | 86.20              | 0.00               |
| July        | 31.30          | 17.50   | 84.40              | 0.00               |
| August      | 33.00          | 18.60   | 91.30              | 0.00               |
| September   | 33.00          | 16.50   | 88.30              | 0.00               |
| October     | 29.00          | 13.40   | 89.40              | 0.00               |
| Season 2020 |                |         |                    |                    |
| May         | 30.00          | 12.00   | 76.00              | 0.00               |
| June        | 33.00          | 16.50   | 84.00              | 0.00               |
| July        | 32.60          | 17.30   | 86.00              | 0.00               |
| August      | 32.50          | 17.20   | 87.70              | 0.00               |
| September   | 32.00          | 13.00   | 87.40              | 0.00               |
| October     | 29.20          | 12.00   | 90.20              | 0.00               |

Table S2. Soil properties of the experimental site.

| Character                     | Seasons |        |       |        |
|-------------------------------|---------|--------|-------|--------|
|                               | 2019    |        | 2020  |        |
|                               | 0- 20*  | 20- 40 | 0- 20 | 20- 40 |
| Chemical analysis             |         |        |       |        |
| PH                            | 7.90    | 8.30   | 8.10  | 8.30   |
| Organic matter (%)            | 1.50    | 1.65   | 1.40  | 1.50   |
| Soluble cations (meq/l)       |         |        |       |        |
| Na <sup>+</sup>               | 11.70   | 12.60  | 14.50 | 15.60  |
| Ca <sup>++</sup>              | 5.30    | 5.10   | 9.50  | 9.30   |
| K <sup>+</sup>                | 0.50    | 0.65   | 1.55  | 1.76   |
| Mg <sup>++</sup>              | 2.30    | 2.10   | 3.40  | 3.20   |
| Soluble Anions (meq/l)        |         |        |       |        |
| Cl <sup>-</sup>               | 9.90    | 9.10   | 8.10  | 8.40   |
| HCo <sub>3</sub> <sup>-</sup> | 3.80    | 4.30   | 5.90  | 6.50   |
| So <sub>4</sub> <sup>++</sup> | 13.50   | 17.50  | 14.25 | 14.80  |
| Mechanical analysis           |         |        |       |        |
| Clay (%)                      | 55.80   | 55.95  | 56.20 | 55.75  |
| Sand (%)                      | 13.45   | 13.85  | 12.70 | 13.60  |
| Silt (%)                      | 30.75   | 30.20  | 31.10 | 30.65  |
| Soil texture                  | Clay    | Clay   | Clay  | Clay   |

\*Sample depth (cm)

Table S3. Scores and symptoms of leaf rolling at vegetative stage .

| Scores | Leaf rolling                                          |
|--------|-------------------------------------------------------|
| 1      | No rolling                                            |
| 3      | Partially rolled, unrolled in the evening             |
| 5      | Partially unrolling in late evening and early morning |
| 7      | Complete unrolling in the morning                     |
| 9      | Like tube no unrolling in the morning                 |
